# Supplementary material
Source: PubMed Central journal article supplement (PMC4147069)

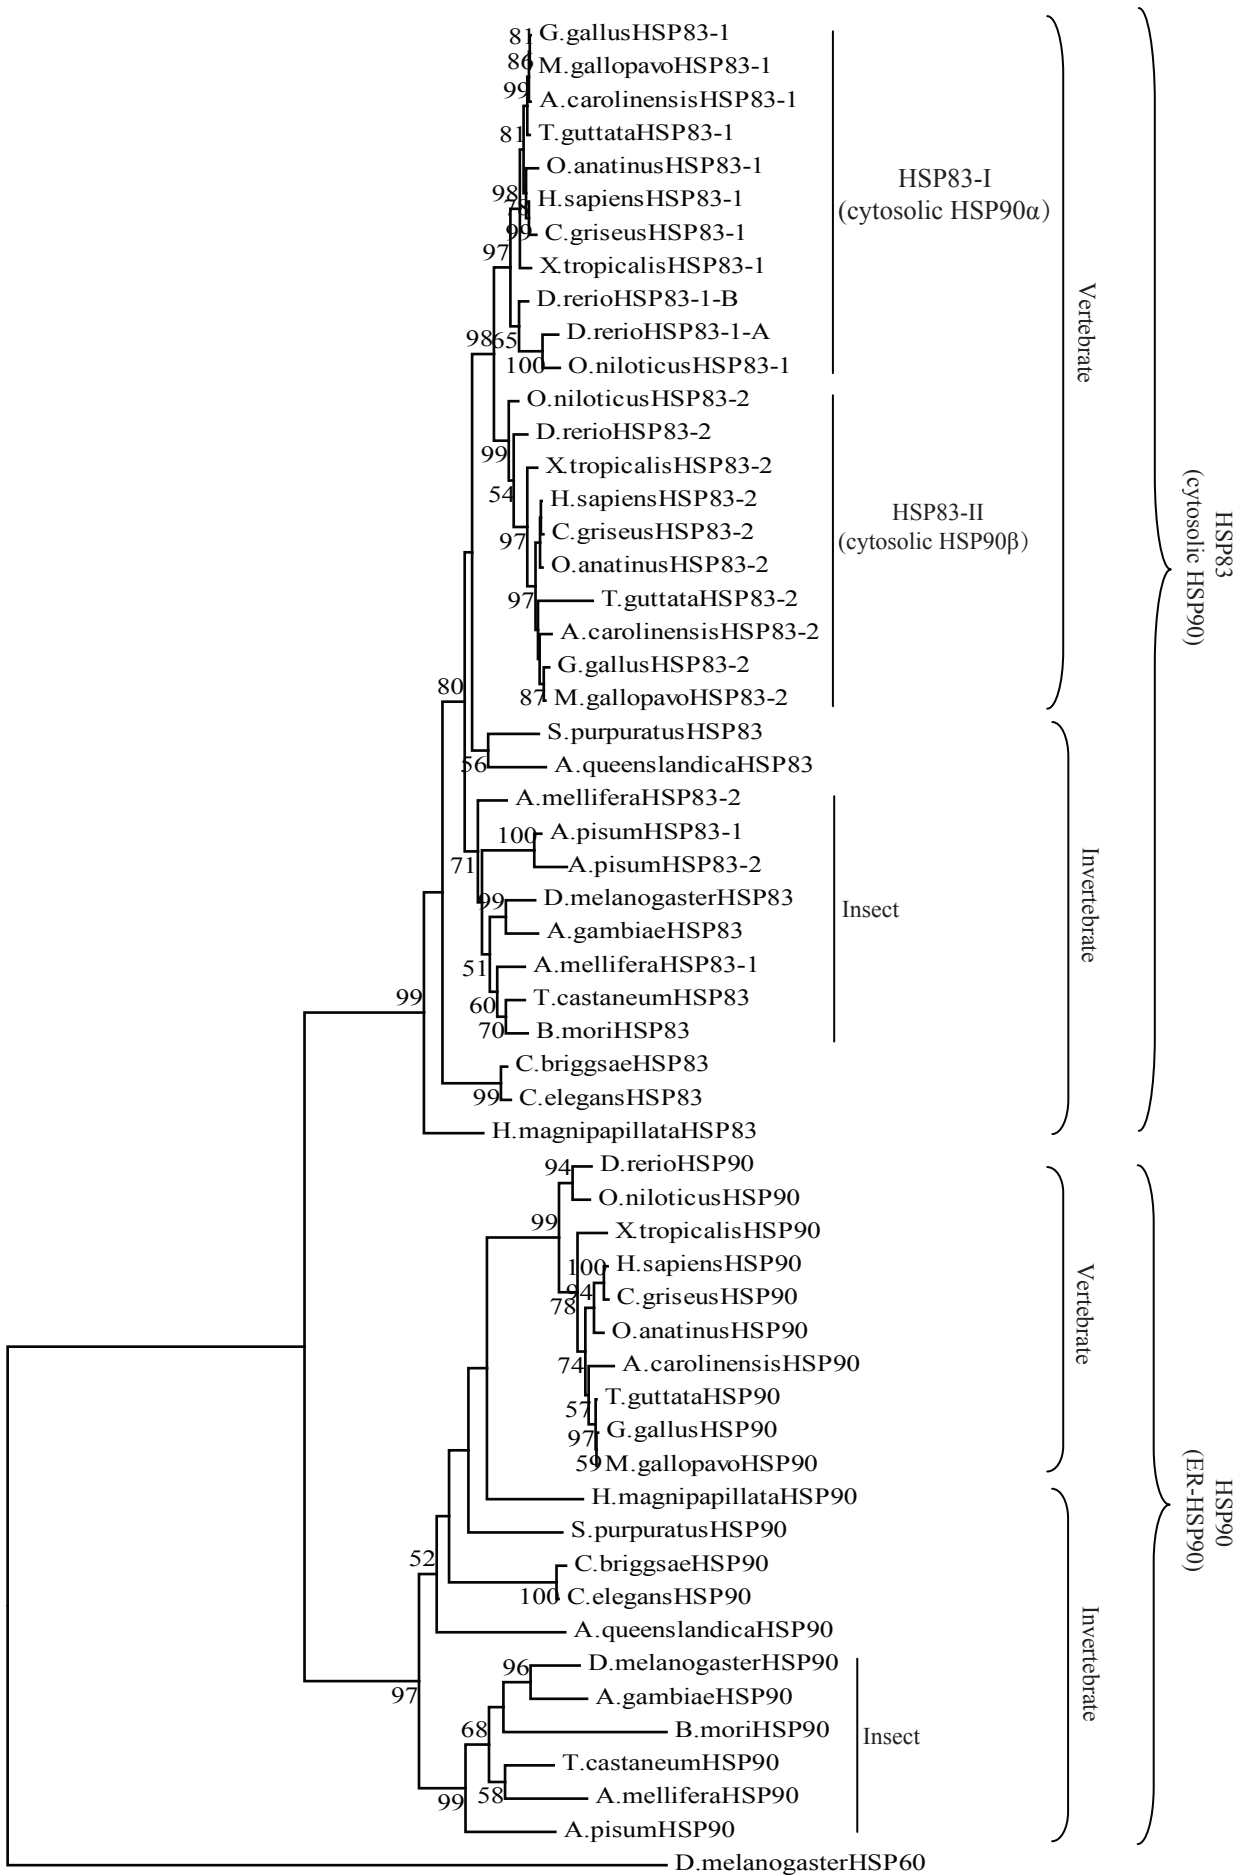

Supplement: 12192_2013_487_MOESM5_ESM.pdf [file 12192_2013_487_MOESM5_ESM.pdf]
